# Supplementary material for: Microreactor-assisted synthesis of surface-active oxygen-rich Mn–Ce oxide particles and their catalytic activity in the wet air oxidation process
Source: Royal Society of Chemistry journal article supplement (doi:10.1039/d6ra01056c), 2026-05-19

## Supporting Information

### Microreactor-assisted synthesis of surface-active oxygen-rich Mn–Ce oxide particles and their catalytic activity in the wet air oxidation process

Tenta Yamaro, Takumi Hatashita and Noritsugu Kometani \*

#### Materials

Manganese(II) nitrate hexahydrate ( $\text{Mn}(\text{NO}_3)_2 \cdot 6\text{H}_2\text{O}$ , >98%), cerium(III) nitrate hexahydrate ( $\text{Ce}(\text{NO}_3)_3 \cdot 6\text{H}_2\text{O}$ , >98%), potassium permanganate ( $\text{KMnO}_4$ , 99.3%), potassium hydroxide ( $\text{KOH}$ , 0.2 M aqueous solution), and phenol (>99%) were purchased from Kishida Chemical Co., Ltd. (Japan). All chemicals were used without further purification. Aqueous solutions of the desired concentrations were prepared by dissolving the above chemicals in distilled deionized water obtained using an RFD240NC system (Advantec, Japan). Oxygen and nitrogen gases were purchased from Iwatani Fine Gas Inc. (Japan) and used without further purification.

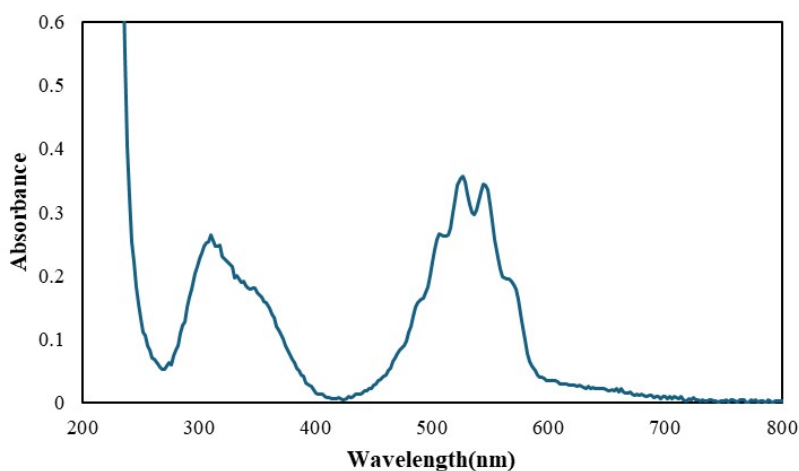

Figure. S1 UV–Vis spectrum of the filtrate obtained after the catalyst synthesis by the stirring–mixing method.

□□□□□(a) Mn:Ce=5:1

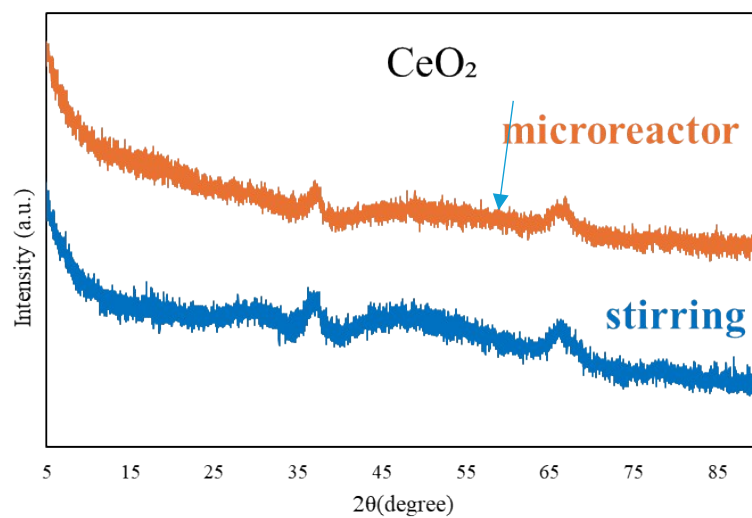

(b) Mn:Ce=1:1

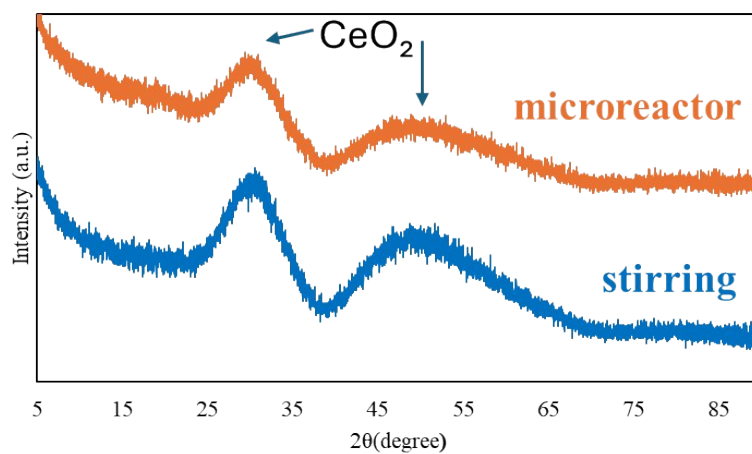

(c) Mn only

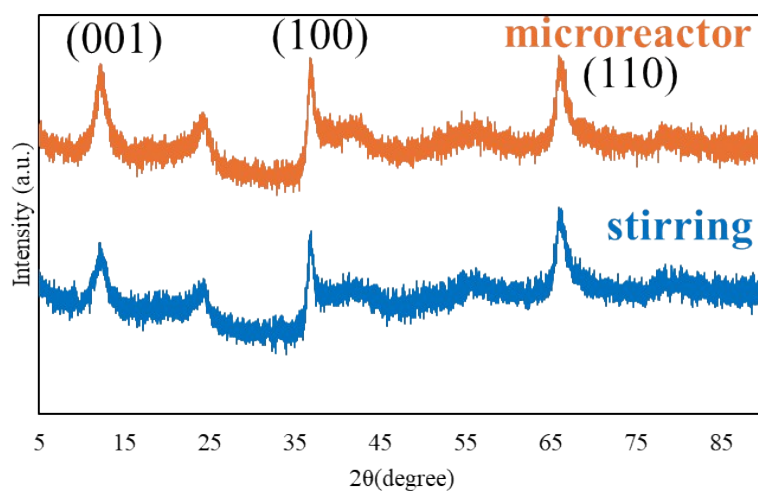

Figure. S2 XRD patterns of the catalysts synthesized with different Mn:Ce molar ratios.

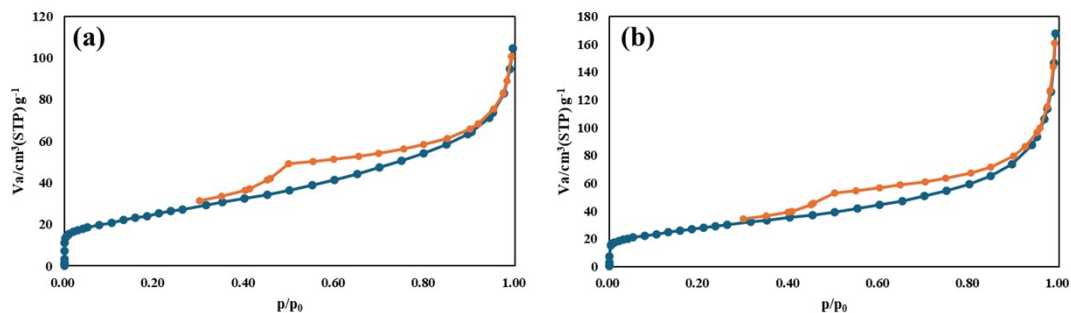

Figure S3. (a)  $N_2$  adsorption–desorption isotherms of the catalyst synthesized by the stirring–mixing method and (b)  $N_2$  adsorption–desorption isotherms of the catalyst synthesized using the microreactor.

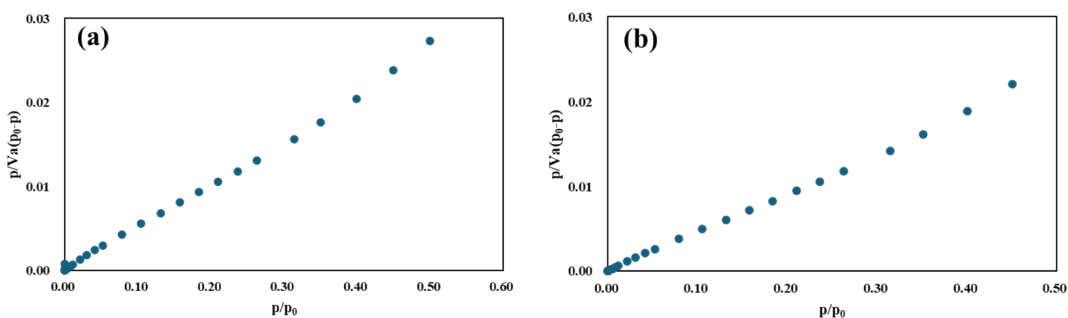

Figure S4. (a) BET plot derived from the  $N_2$  adsorption–desorption isotherm of the catalyst synthesized by the stirring–mixing method. (b) BET plots derived from  $N_2$  adsorption–desorption isotherms of catalysts synthesized using the microreactor.

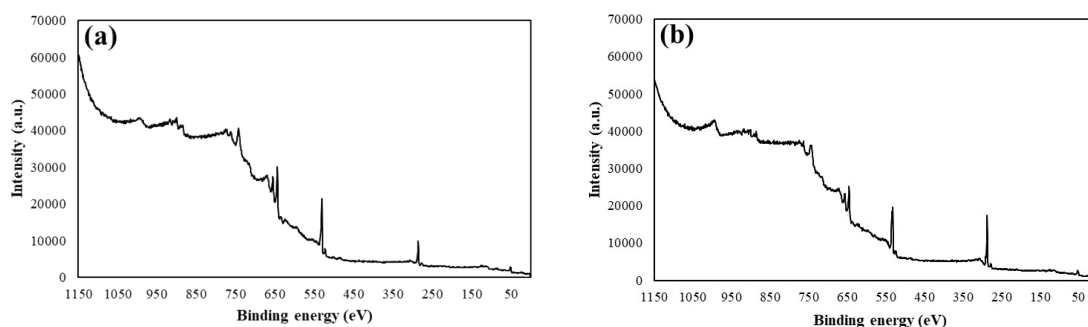

Figure S5. (a) XPS wide spectra of the catalyst synthesized by the conventional stirring-mixing method and (b) that synthesized using the microreactor.

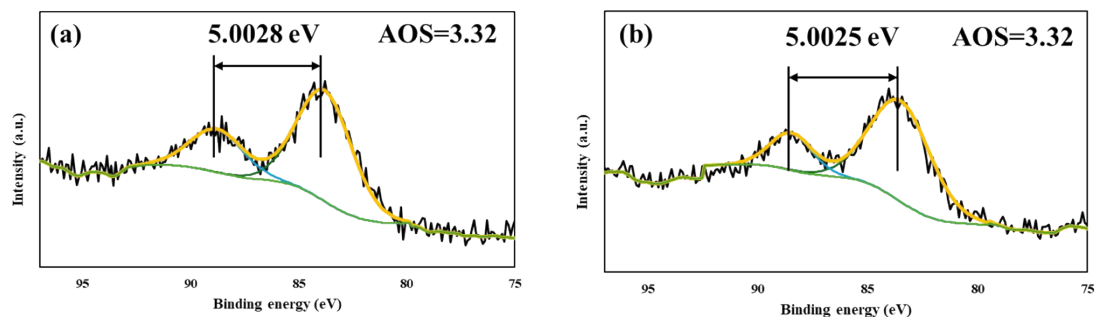

Figure S6. (a) Mn 3s XPS spectrum of the catalyst synthesized by the stirring–mixing method and (b) Mn 3s XPS spectrum of the catalyst synthesized using the microreactor. The surface average oxidation state (AOS) was calculated using the equation  $\text{AOS} = 8.956 - 1.126\Delta E_s$  as reported in ref 39. The slight deviation from the AOS estimated based on the  $\text{Mn}^{3+}/\text{Mn}^{4+}$  ratio in the Mn 2p spectra is attributed to the presence of a small amount of  $\text{Mn}^{2+}$ , which was not considered in the calculation.

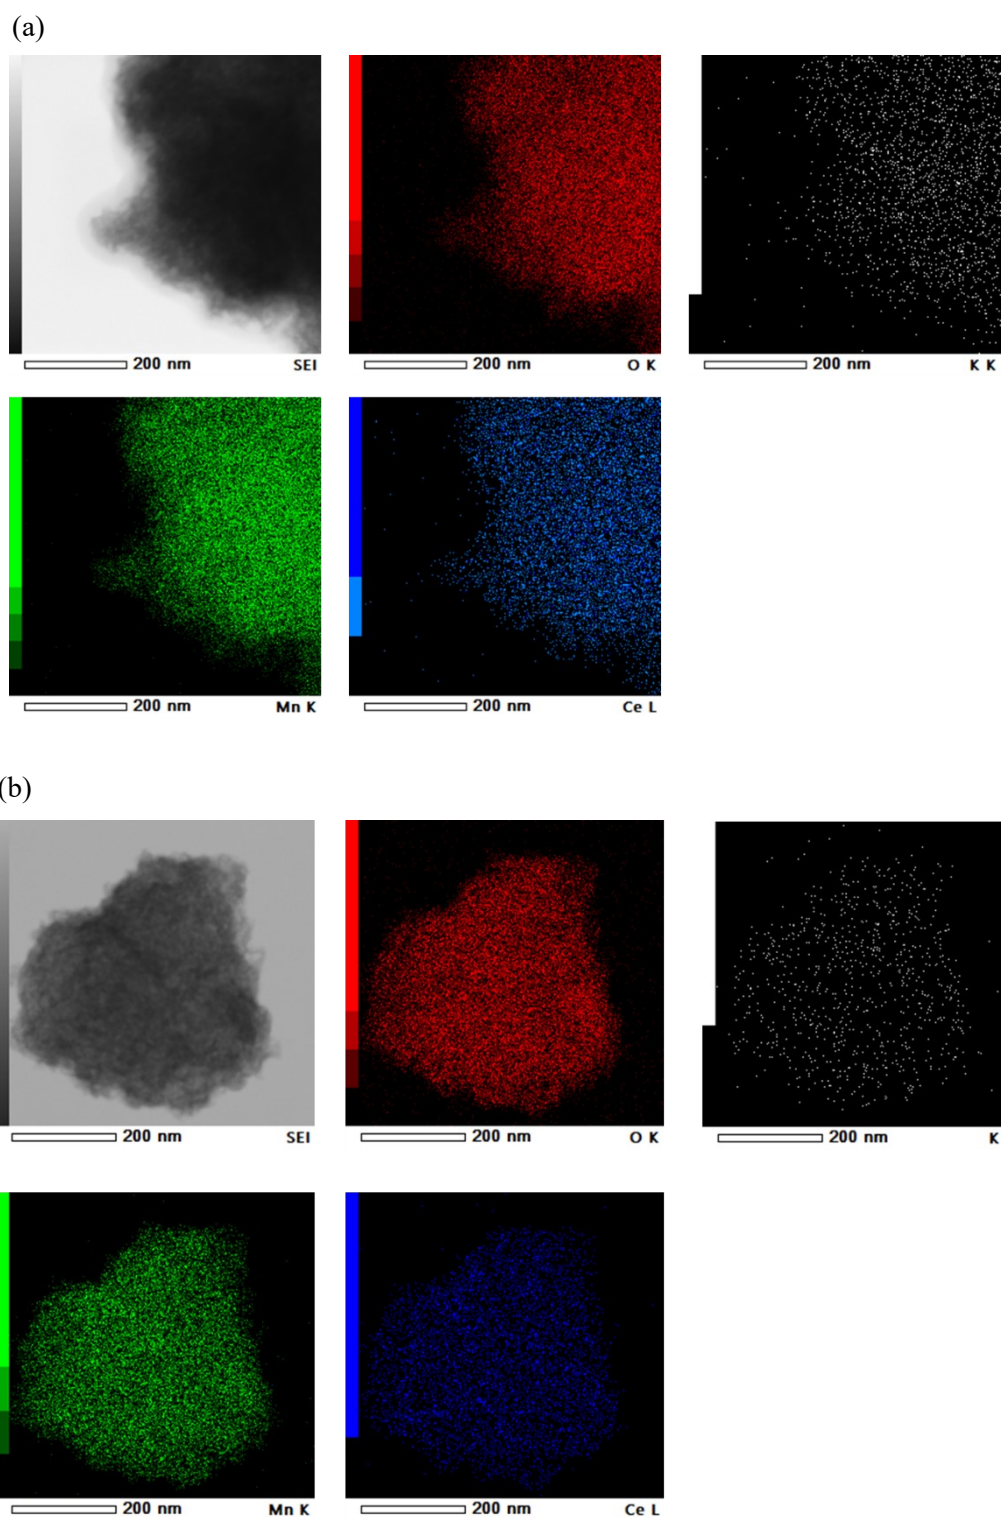

Figure S7. (a) STEM–EDS elemental maps of catalysts prepared by the conventional stirring-mixing method and (b) those of catalysts synthesized using the microreactor.

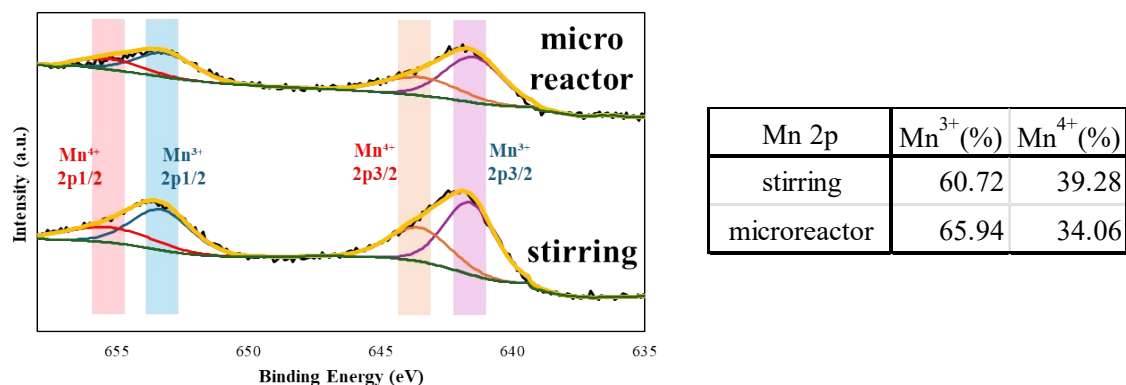

Figure S8. Mn 2p XPS spectra of the catalysts synthesized by the conventional stirring-mixing method and using the microreactor after phenol degradation experiments under an N<sub>2</sub> atmosphere. The corresponding Mn<sup>3+</sup>/Mn<sup>4+</sup> ratios are shown in the right table.

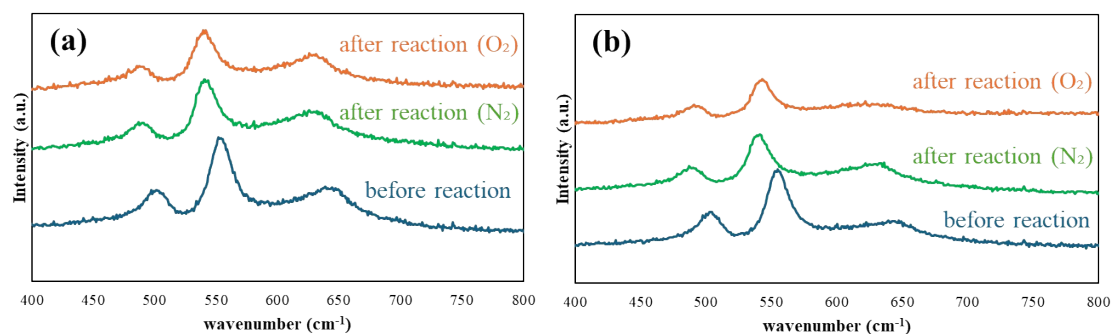

Figure S9. Raman spectra of the catalysts synthesized (a) by the conventional stirring-mixing method and (b) using the microreactor, before and after 2 h of the degradation experiments under each condition.

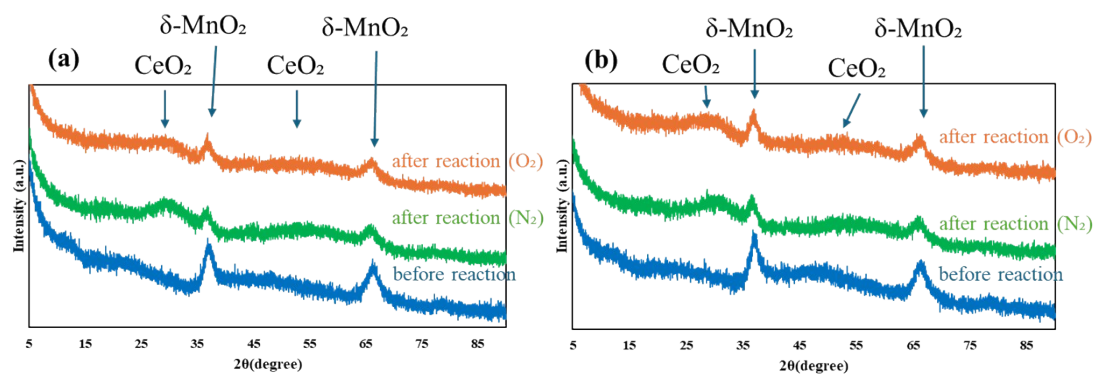

Figure S10. XRD patterns of the catalysts synthesized (a) by the stirring-mixing methods and (b) using the microreactor before and after 2 h of the degradation experiments under each condition.

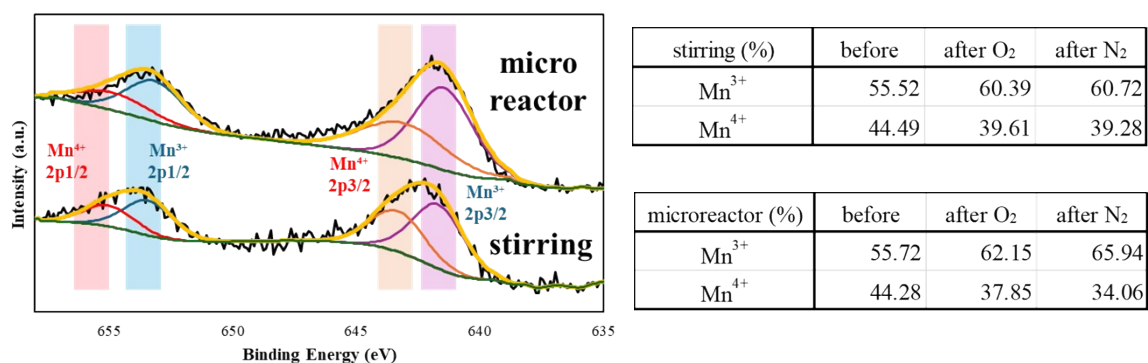

Figure S11. Mn 2p XPS spectra of the catalysts synthesized by the conventional stirring-mixing method and using the microreactor after 2 h of phenol degradation experiments under an O<sub>2</sub> atmosphere and the corresponding Mn<sup>3+</sup>/Mn<sup>4+</sup> peak area ratios.

(a) stirring

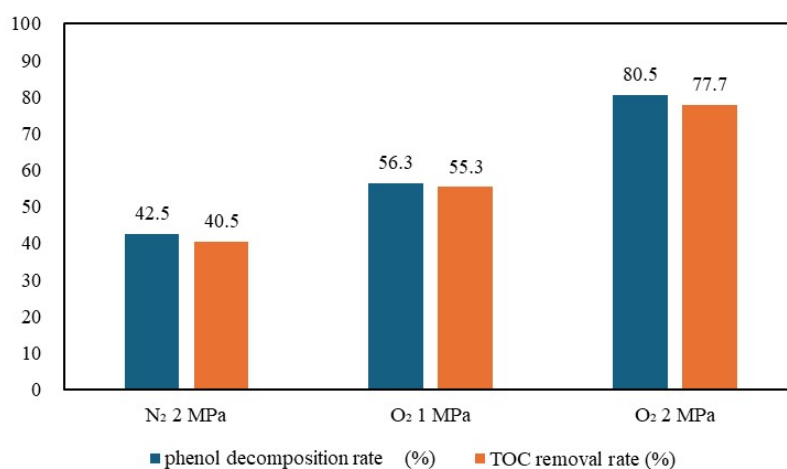

(b) microreactor

Figure S12. Phenol decomposition ratios (%) and TOC removal ratios (%) under different atmospheres and different O<sub>2</sub> pressure conditions for catalysts synthesized by (a) the stirring-mixing method and using (b) the microreactor (reaction time = 2h; reaction temperature = 150°C; phenol concentration = 100 ppm).

Table S1. The Mn-to-Ce ratios for catalysts synthesized by each method before and after 2 h of the phenol decomposition experiments, as determined by XRF measurements.

| stirring | Before reaction | After reaction |
|----------|-----------------|----------------|
| Mn       | 71.3            | 66.2           |
| Ce       | 28.7            | 33.8           |

| microreactor | Before reaction | After reaction |
|--------------|-----------------|----------------|
| Mn           | 71.3            | 68.4           |
| Ce           | 28.7            | 31.6           |

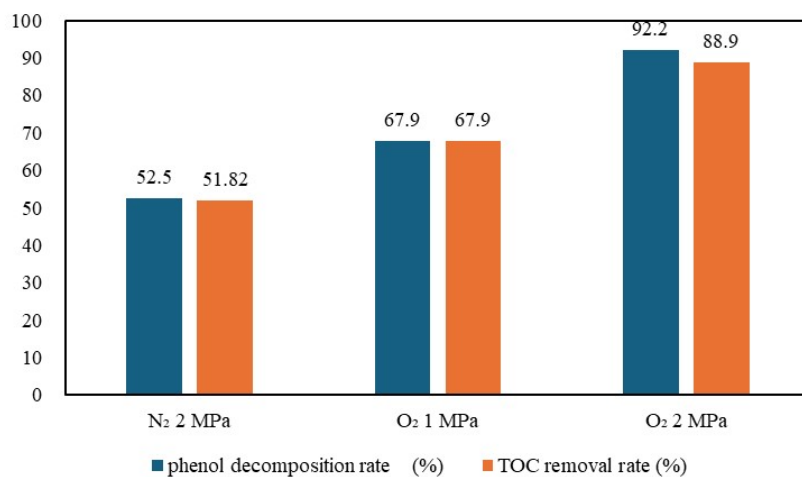

Supplement: d6ra01056c1.pdf [file d6ra01056c1.pdf]
